# Supplementary material for: Disclosing gate-opening/closing events inside a flexible metal–organic framework loaded with CO2 by reactive and essential dynamics
Source: Royal Society of Chemistry journal article supplement (doi:10.1039/d3nr02760k), 2023-01-01

## Supporting Information

# Disclosing Gate-Opening/Closing Events inside a Flexible Metal-Organic Framework loaded with CO<sub>2</sub> by Reactive and Essential Dynamics

Susanna Monti<sup>#</sup>, Cheherazade Trouki<sup>§</sup>, Giovanni Barcaro<sup>§</sup>

<sup>#</sup>CNR-ICCOM, Institute of Chemistry of Organometallic Compounds, Pisa 56124, Italy. E-mail:

<sup>§</sup>CNR-IPCF, Institute of Chemical and Physical Processes, Pisa 56124, Italy.

### Table of Content

1. **Figure S1.** Angle of a CO<sub>2</sub> molecule traveling in a channel with the Z axis.
2. **Figure S2.** CO<sub>2</sub> (four molecules) motion along the Z direction (inside the channels) as a function of the simulation time. Stationary states are evidenced by the highlighted areas. The arrows indicate diffusion along the channels. The blue plot corresponds to the CO<sub>2</sub> in the movie with grey C.
3. **Figure S3.** CO<sub>2</sub> motion along the Z direction (inside the channels) as a function of the simulation time compared with the rotations of the rings close by to identify the kicks responsible for diffusion.
4. **Figure S4.** Extracted structures of the A linkers for QC optimizations and rotational barriers estimations. Color code: O red, C dark cyan, F green. Top: single linker, torsional energy profile calculated at the M062X/6-31G(d,p) level of theory. Bottom: A linker pair, constrained (top), and optimized geometries (bottom) to give a rough estimate of the ring flipping barrier.
5. **Table S1.** Weights of the calculated PCA modes for selected A and B linkers.
6. **Figure S5.** Linkers pairs forming a section of the channel. From top to bottom: type A, type A, type B. Mode 2 (green slice of the pie plot) identified by PCA (superimposing all the snapshots on the coordinated Ce atoms and carboxyl oxygens – rmsd values are reported in Figure 3). Structure color code: O red, C dark cyan, F green.
7. **Figure S6.** Histograms of the fluctuations of the first three principal components (or modes) of a) all six linkers; b) linkers A, c) linkers A, d) linkers B.
8. **Figure S7.** Linkers pairs forming a section of the channel. Mode 3 identified by PCA (superimposing all the snapshots on the coordinated Ce atoms and carboxyl oxygens – rmsd values are reported in Figure 3). Porcupine rendering of the main linker movements. Structure color code: O red, C dark cyan, F green.
9. **Figure S8.** Variability of the channel due to the libration of linkers A (six-linker portion). On the left, the channel has been filled with spheres using CAVER, whereas on the right, the surface accessible to the solvent (SAS) has been visualized to give an idea of the section variations. In a and c are displayed the librations with the maximum amplitude, while in b average structure (considering only the dominant mode – Mode 1). Structure color code: O red, C dark cyan, F green.
10. **Figure S9.** Possible breathing effect in three parallel channels of the MOF structure: a) opening stage, b) closing stage.
11. Data connected to the force field parametrization and validation.

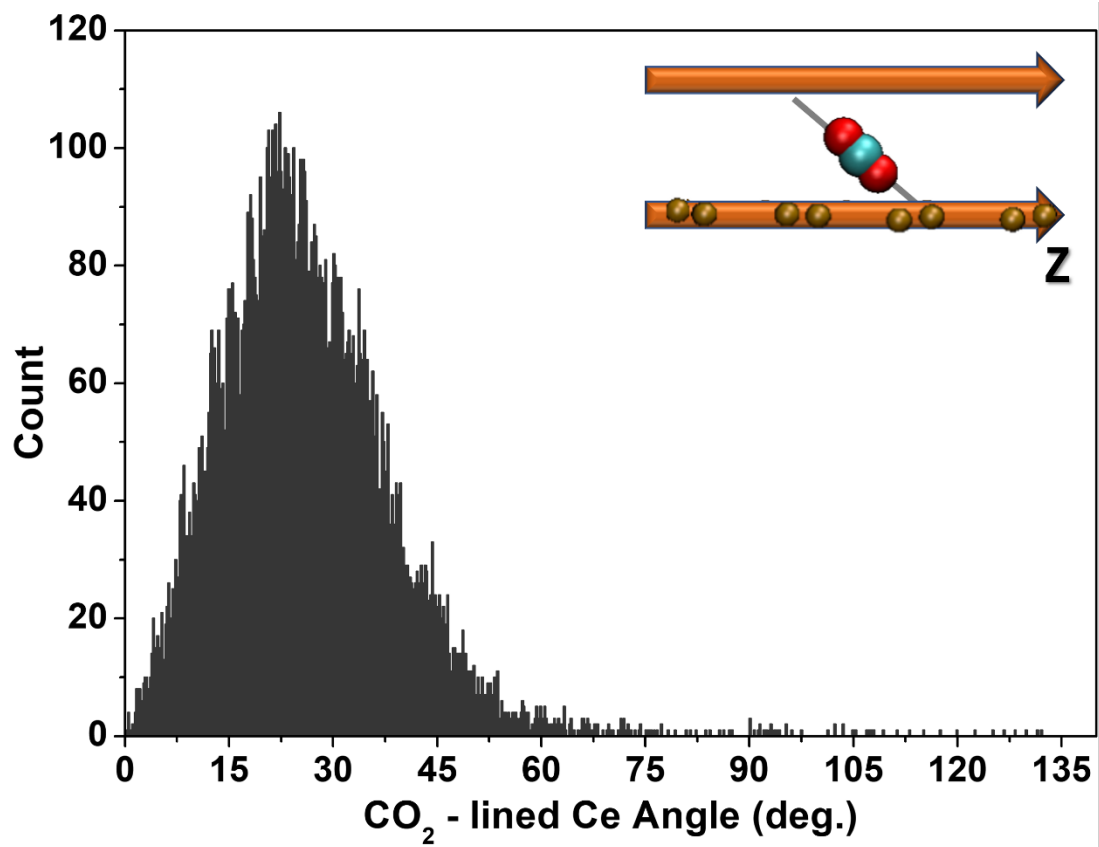

Figure S1. Angle of a CO<sub>2</sub> molecule (traveling in a channel) with the axis of the channel.

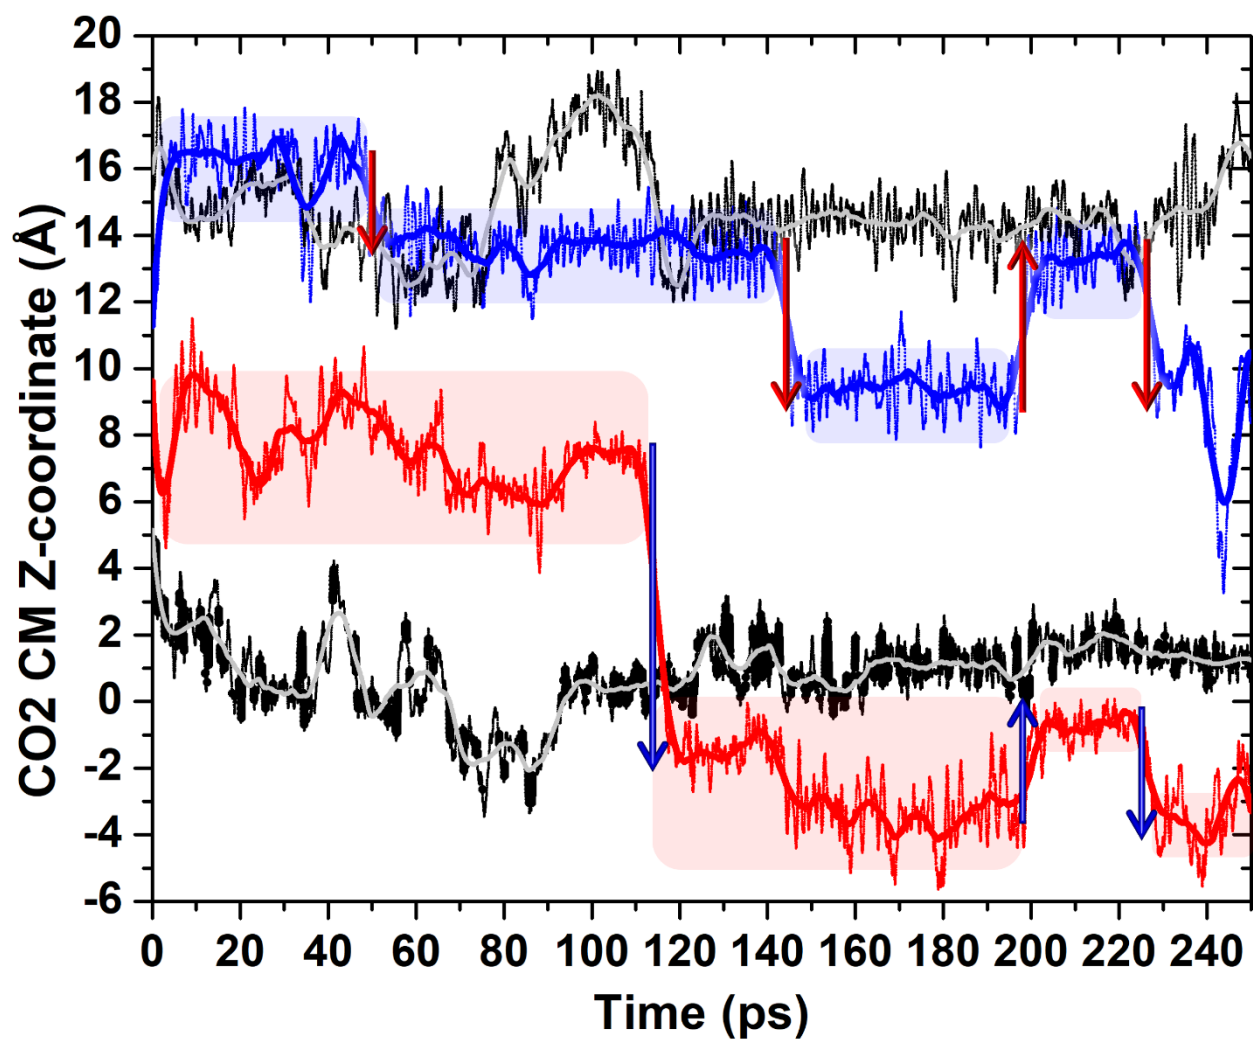

**Figure S2.** CO<sub>2</sub> (four molecules) motion along the Z direction (inside the channels) as a function of the simulation time. Stationary states are evidenced by the highlighted areas. The arrows indicate diffusion along the channels. The blue plot corresponds to the CO<sub>2</sub> in the Supplementary Video with grey C.

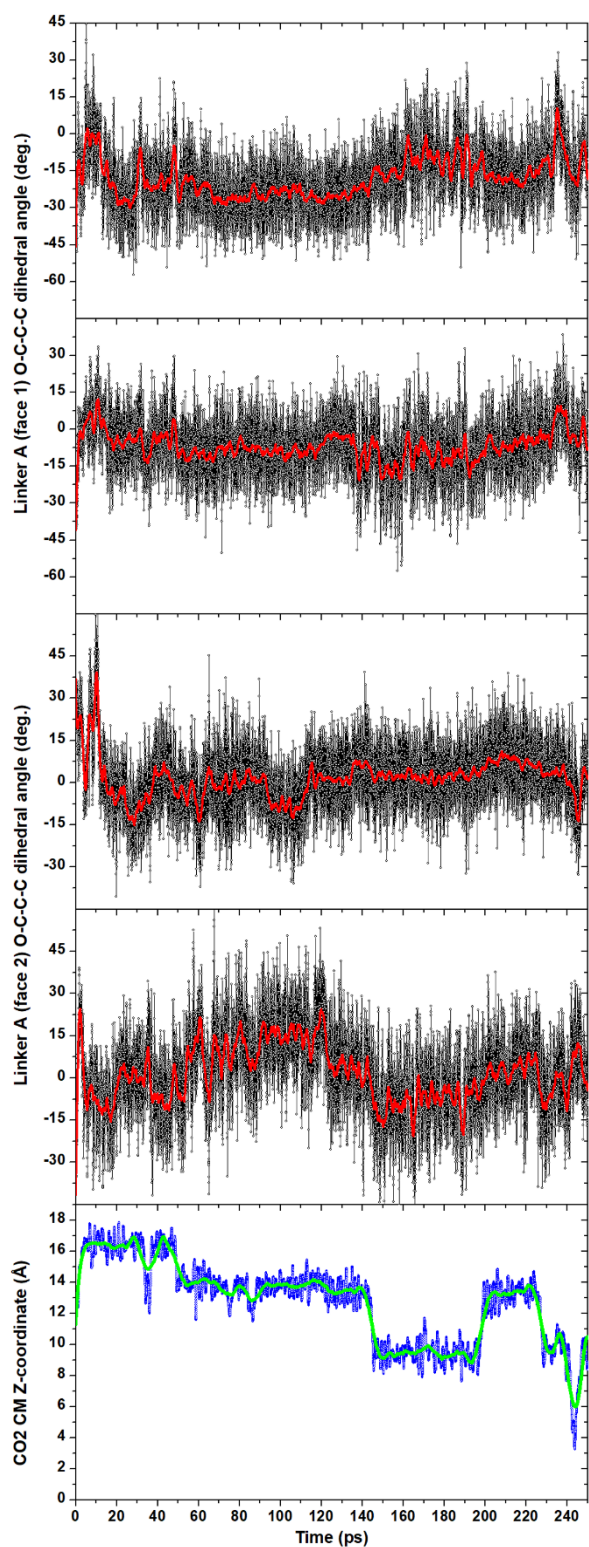

**Figure S3.** CO<sub>2</sub> motion along the Z direction (inside the channels) as a function of the simulation time compared with the rotations of the rings close by to identify the kicks responsible for diffusion.

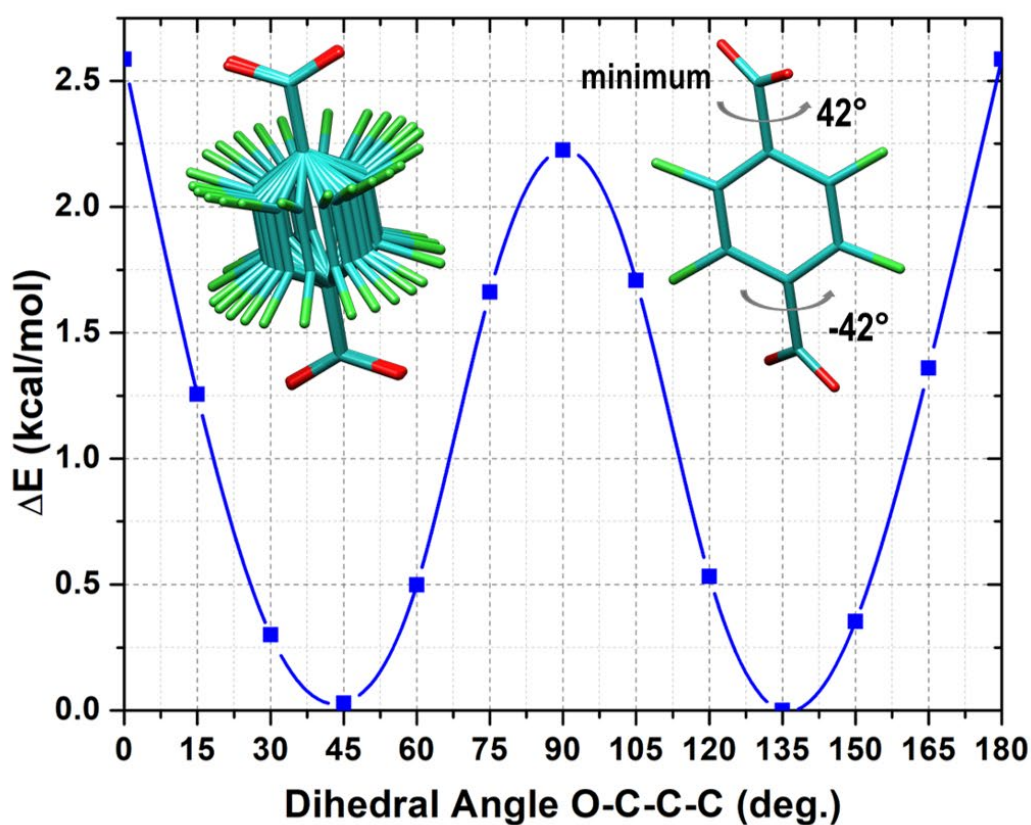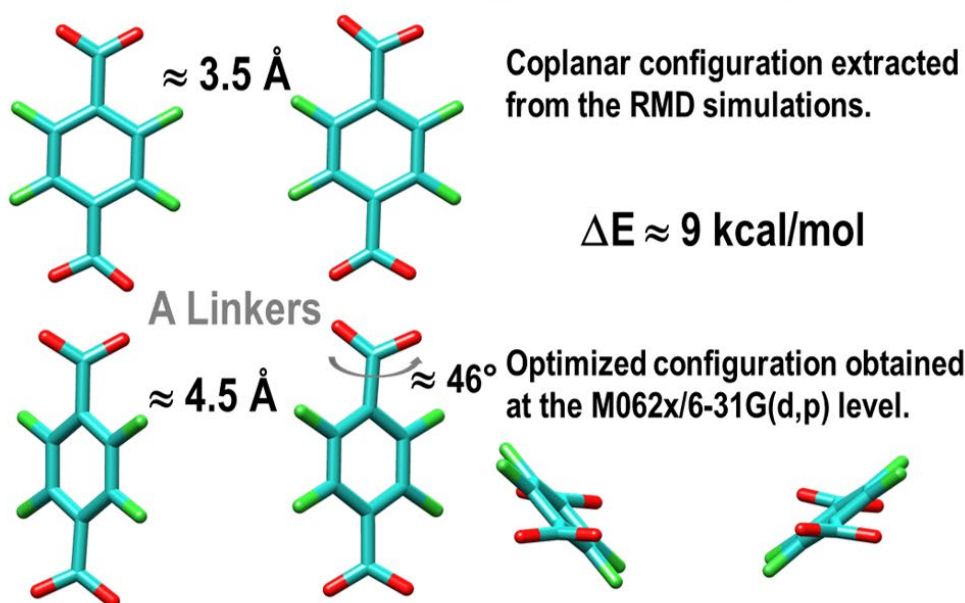

**Figure S4.** Extracted structures of the A linkers for QC optimizations and rotational barriers estimations. Color code: O red, C dark cyan, F green. **Top:** single linker, torsional energy profile calculated at the M062X/6-31G(d,p) level of theory. **Bottom:** A linker pair, constrained (top), and optimized geometries (bottom) to give a rough estimate of the ring flipping barrier.

**Table S1.** Weights of the calculated PCA modes for selected A and B linkers

| Mode |                                                                                   | 2A linkers | 2A linkers | 2 B linkers | 4A + 2B linkers |
|------|-----------------------------------------------------------------------------------|------------|------------|-------------|-----------------|
|      |                                                                                   | %          | %          | %           | %               |
| 1    |  | 60         | 65         | 38          | 55              |
| 2    |  | 15         | 9          | 16          | 14              |
| 3    |  | 6          | 7          | 11          | 7               |
| 4    |  | 6          | 6          | 10          | 5               |
| 5    |  | 5          | 4          | 7           | 4               |
| 6    |  | 2          | 3          | 5           | 4               |
| 7    |  | 1          | 2          | 4           | 3               |
| 8    |  | 1          | 2          | 3           | 3               |
| 9    |  | 1          | 1          | 3           | 3               |
| 10   |  | 1          | 1          | 3           | 2               |

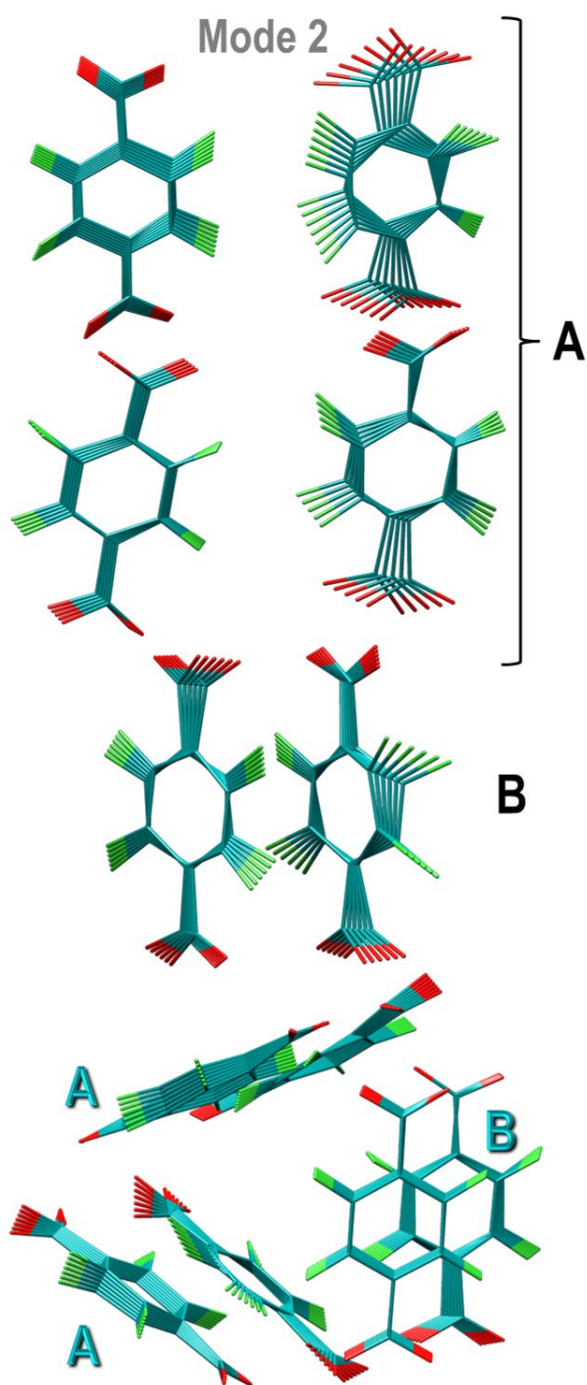

**Figure S5.** Linkers pairs forming a section of the channel. From top to bottom: type A, type A, type B. **Mode 2** (green slice of the pie plot) identified by PCA (superimposing all the snapshots on the coordinated Ce atoms and carboxyl oxygens – rmsd values are reported in **Figure S3**). Structure color code: O red, C dark cyan, F green.

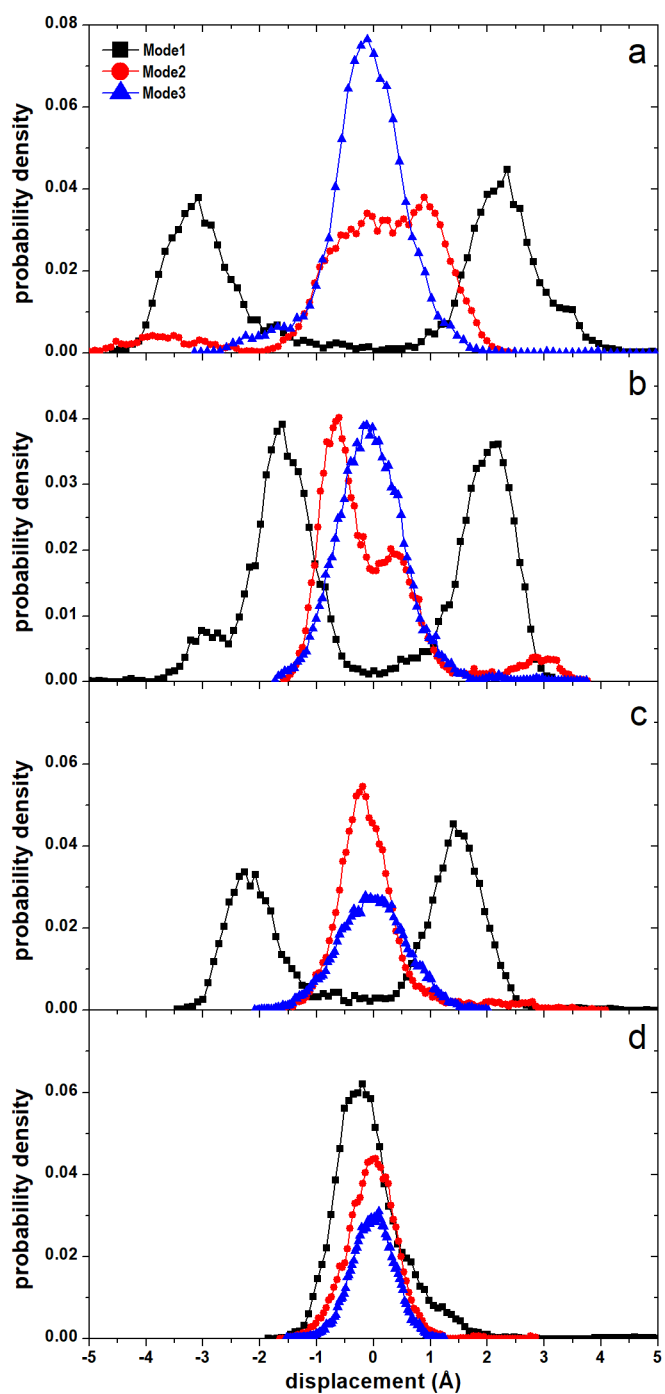

**Figure S6.** Histograms of the fluctuations of the first three principal components (or modes) of a) all six linkers; b) linker A, c) linker A, d) linker B.



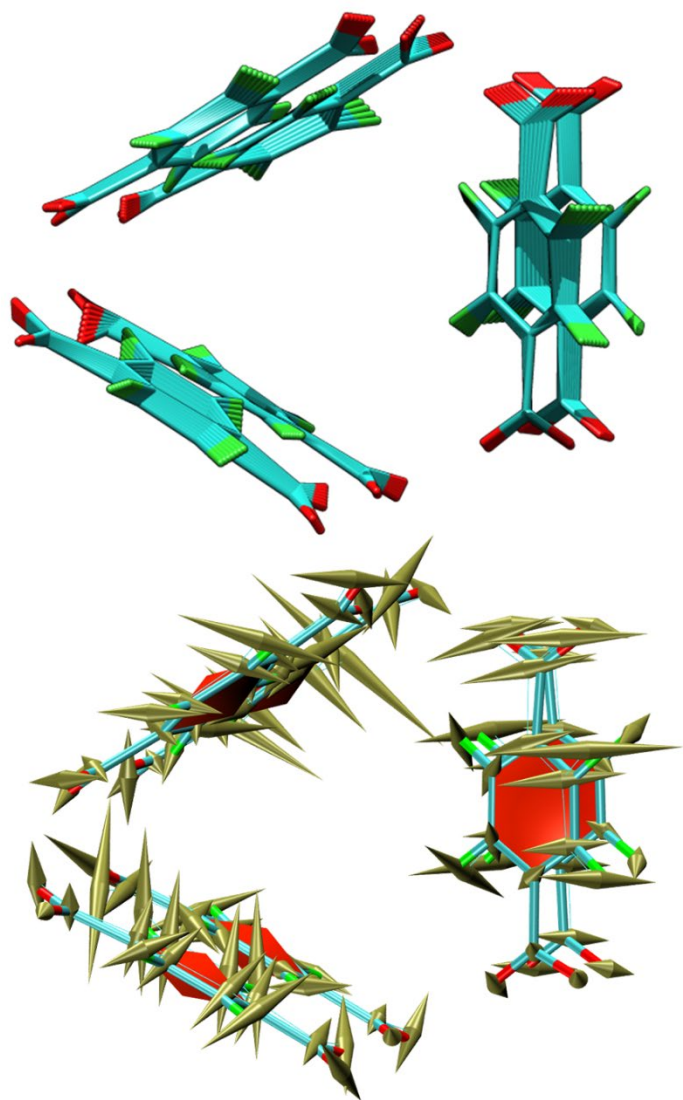

**Figure S7.** Linkers pairs forming a section of the channel. **Mode 3** identified by PCA (superimposing all the snapshots on the coordinated Ce atoms and carboxyl oxygens – rmsd values are reported in **Figure S5**). Porcupine rendering of the main linker movements. Structure color code: O red, C dark cyan, F green.

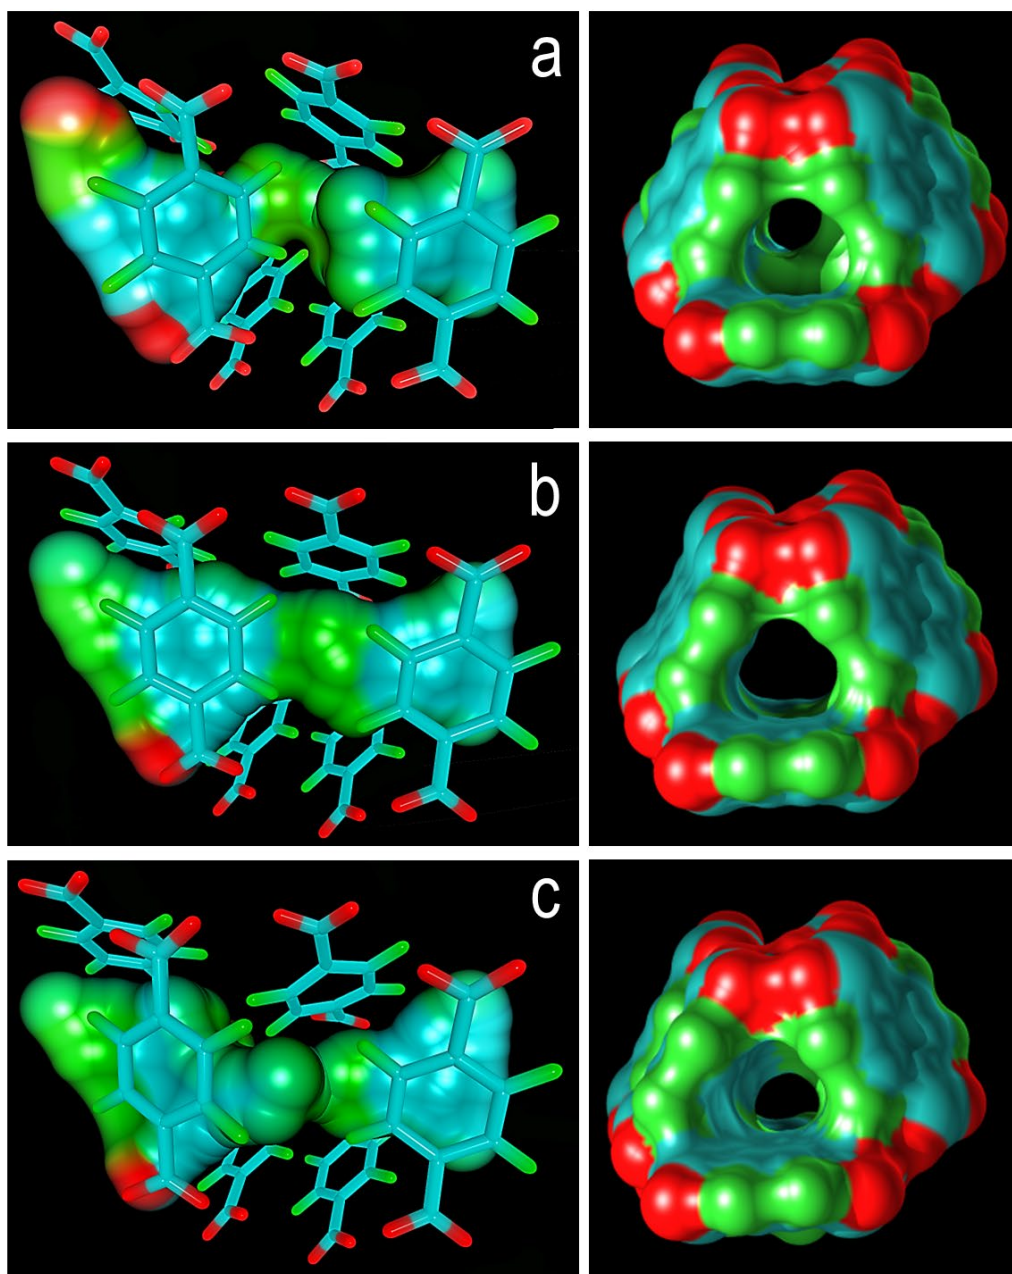

**Figure S8.** Variability of the channel due to the libration of linkers A (six-linker portion). On the left, the channel has been filled with spheres using CAVER, whereas on the right, the surface accessible to the solvent (SAS) has been visualized to give an idea of the section variations. In a and c are displayed the librations with the maximum amplitude, while in b average structure (considering only the dominant mode – Mode 1). Structure color code: O red, C dark cyan, F green.

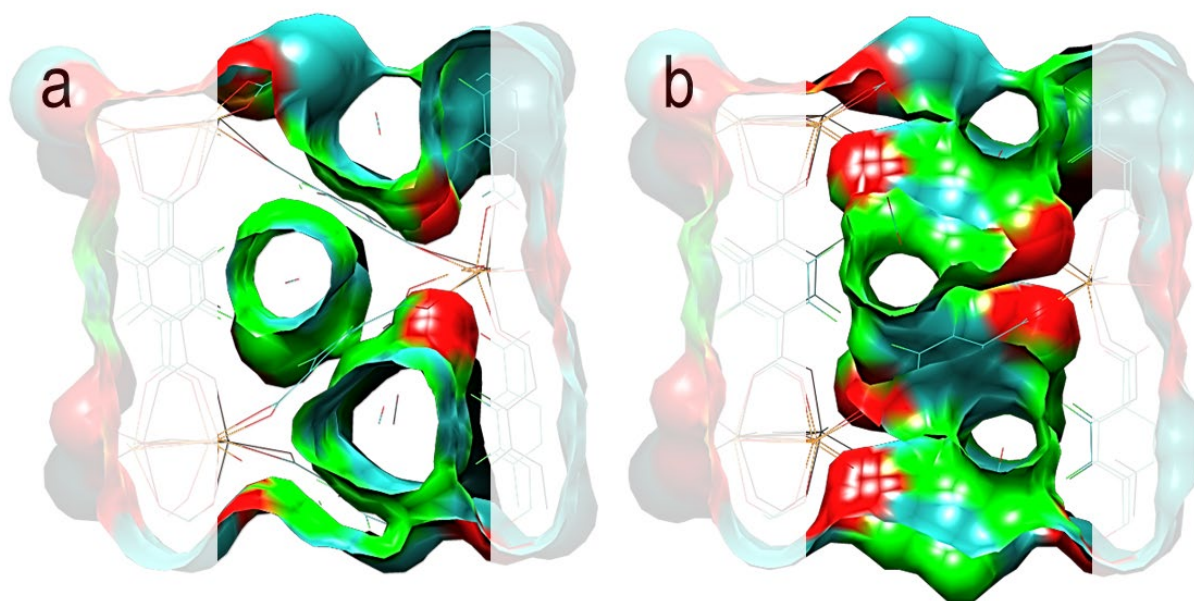

**Figure S9.** Possible breathing effect in three parallel channels of the MOF structure: **a)** opening stage, **b)** closing stage. Some of the CO<sub>2</sub> molecules are visible inside the open channels. Structure color code: O red, C dark cyan, F green.





```

Reactive MD-force field used for F4_MIL140A(Ce)
39      ! Number of general parameters
50.0000 !Overcoordination parameter
9.5469  !Overcoordination parameter
26.5405 !Valency angle conjugation parameter
1.7224 !Triple bond stabilisation parameter
6.8702 !Triple bond stabilisation parameter
60.4850 !C2-correction
1.0588 !Undercoordination parameter
4.6000 !Triple bond stabilisation parameter
12.1176 !Undercoordination parameter
13.3056 !Undercoordination parameter
-70.5044 !Triple bond stabilization energy
0.0000 !Lower Taper-radius
10.0000 !Upper Taper-radius
2.8793 !Fe dimer correction
33.8667 !Valency undercoordination
6.0891 !Valency angle/lone pair parameter
1.0563 !Valency angle
2.0384 !Valency angle parameter
6.1431 !Fe dimer correction
6.9290 !Double bond/angle parameter
0.3989 !Double bond/angle parameter: overcoord
3.9954 !Double bond/angle parameter: overcoord
-2.4837 !Fe dimer correction
5.7796 !Torsion/BO parameter
10.0000 !Torsion overcoordination
1.9487 !Torsion overcoordination
-1.2327 !Reserved
2.1645 !Conjugation
1.5591 !vdWaals shielding
0.1000 !Cutoff for bond order (*100)
2.1365 !Valency angle conjugation parameter
0.6991 !Overcoordination parameter
50.0000 !Overcoordination parameter
1.8512 !Valency/lone pair parameter
0.5000 !ACKS2 softness parameter
20.0000 !Scale factor (d) in dispersion (LJ)
5.0000 !Reserved
0.0000 !1: disable undecoord term in val angle
2.6962 !Valency angle conjugation parameter
6      ! Nr of atoms; cov.r; valency;a.m;Rvdw;Evdw;gammaEEM;cov.r2;#
      alfa;gammavdW;valency;Eunder;Eover;chiEEM;etaEEM;n.u.
      cov r3;Elp;Heat inc.;bol31;bol32;bol33;softcut;n.u.
      ov/un;vall;n.u.;val3,vval4
C      1.3674  4.0000  12.0000  2.0453  0.1444  0.7920  1.1706  4.0000
      9.0000  1.5000  4.0000  27.5134  79.5548  6.7897  6.0000  0.0000
      1.1168  0.0000  181.0000  14.2732  24.4406  6.7313  0.8563  0.0000
      -4.1021  5.0000  1.0564  4.0000  2.9663  0.0000  0.0000  0.0000
H      0.8930  1.0000  1.0080  1.3550  0.0930  0.8203  -0.1000  1.0000
      8.2230  33.2894  1.0000  0.0000  121.1250  3.7248  9.6093  1.0000
      -0.1000  0.0000  61.6606  3.0408  2.4197  0.0003  1.0698  0.0000
      -19.4571  4.2733  1.0338  1.0000  2.8793  0.0000  0.0000  0.0000
O      1.2450  2.0000  15.9990  2.3890  0.1000  1.0898  1.0548  6.0000
      9.7300  13.8449  4.0000  37.5000  116.0768  8.5000  8.3122  2.0000
      0.9049  0.4056  59.0626  3.5027  0.7640  0.0021  0.9745  0.0000
      -3.5500  2.9000  1.0493  4.0000  2.9225  0.0000  0.0000  0.0000
Ce     2.6062  3.0000  140.1160  2.8303  0.3338  1.2500  0.0100  3.0000
      11.8468  12.5107  3.0000  0.0078  0.0000  -3.7987  7.2405  0.0000
      -1.2000  0.0000  101.0038  5.3430  10.1260  0.7590  0.0000  0.0000
      -2.5000  2.4588  1.0338  6.0000  2.5791  0.0000  0.0000  0.0000
F      1.1846  1.0000  18.9984  1.7922  0.1267  0.4038  -0.1000  7.0000
      10.3184  7.5000  1.0000  9.2533  0.2000  9.3891  6.5612  2.0000
      -1.0000  3.5571  18.0000  6.9821  4.1799  1.0561  0.0000  0.0000
      -7.3000  2.6656  1.0493  4.0000  2.9225  0.0000  0.0000  0.0000
X      -0.1000  2.0000  1.0080  2.0000  0.0000  1.0000  -0.1000  6.0000
      10.0000  2.5000  4.0000  0.0000  0.0000  3.5000  85.0000  0.0000
      -0.1000  0.0000  -2.3700  8.7410  13.3640  0.6690  0.9745  0.0000
      -11.0000  2.7466  1.0338  6.2998  2.8793  0.0000  0.0000  0.0000
15     ! Nr of bonds; Edis1;LPpen;n.u.;pbe1;pbo5;13corr;pbo6
      pbe2;pbo3;pbo4;n.u.;pbo1;pbo2;ovcorr

```

|    |   |                                                            |          |         |         |          |         |          |        |
|----|---|------------------------------------------------------------|----------|---------|---------|----------|---------|----------|--------|
| 1  | 1 | 80.8865                                                    | 107.9944 | 52.0636 | 0.5218  | -0.3636  | 1.0000  | 34.9876  | 0.7769 |
|    |   | 6.1244                                                     | -0.1693  | 8.0804  | 1.0000  | -0.0586  | 8.1850  | 1.0000   | 0.0000 |
| 1  | 2 | 169.4760                                                   | 0.0000   | 0.0000  | -0.6083 | 0.0000   | 1.0000  | 6.0000   | 0.7652 |
|    |   | 5.2290                                                     | 1.0000   | 0.0000  | 1.0000  | -0.0500  | 6.9136  | 0.0000   | 0.0000 |
| 2  | 2 | 153.3934                                                   | 0.0000   | 0.0000  | -0.4600 | 0.0000   | 1.0000  | 6.0000   | 0.7300 |
|    |   | 6.2500                                                     | 1.0000   | 0.0000  | 1.0000  | -0.0790  | 6.0552  | 0.0000   | 0.0000 |
| 1  | 3 | 95.6228                                                    | 137.8227 | 68.8810 | 0.4203  | -0.3774  | 1.0000  | 18.8662  | 0.6845 |
|    |   | 1.1270                                                     | -0.3355  | 9.0448  | 1.0000  | -0.1842  | 5.6293  | 0.0000   | 0.0000 |
| 1  | 4 | 0.0000                                                     | 0.0000   | 0.0000  | 0.5000  | -0.3000  | 1.0000  | 16.0000  | 0.5000 |
|    |   | 0.5000                                                     | -0.2500  | 15.0000 | 1.0000  | -0.1000  | 9.0000  | 0.0000   | 0.0000 |
| 3  | 3 | 142.2858                                                   | 145.0000 | 50.8293 | 0.2506  | -0.1000  | 1.0000  | 29.7503  | 0.6051 |
|    |   | 0.3451                                                     | -0.1055  | 9.0000  | 1.0000  | -0.1225  | 5.5000  | 1.0000   | 0.0000 |
| 2  | 3 | 160.0000                                                   | 0.0000   | 0.0000  | -0.5725 | 0.0000   | 1.0000  | 6.0000   | 0.5626 |
|    |   | 1.1150                                                     | 1.0000   | 0.0000  | 0.0000  | -0.0920  | 4.2790  | 0.0000   | 0.0000 |
| 2  | 4 | 93.4841                                                    | 0.0000   | 0.0000  | -0.6193 | -0.5000  | 0.0000  | 35.0000  | 0.2069 |
|    |   | 0.2906                                                     | -0.5000  | 25.0000 | 0.0000  | -0.1018  | 8.8004  | 0.0000   | 0.0000 |
| 3  | 4 | 137.0329                                                   | 60.1493  | 0.0000  | -0.2126 | -0.5000  | 0.0000  | 35.0000  | 0.1756 |
|    |   | 2.7425                                                     | -0.3288  | 10.4385 | 0.0000  | -0.0767  | 4.8724  | 0.0000   | 0.0000 |
| 4  | 4 | 134.1649                                                   | 0.0000   | 0.0000  | -0.7905 | -0.2000  | 0.0000  | 16.0000  | 0.1000 |
|    |   | 3.0443                                                     | -0.2000  | 15.0000 | 0.0000  | -0.2106  | 5.0057  | 0.0000   | 0.0000 |
| 1  | 5 | 242.5403                                                   | 2.3373   | 0.0000  | -0.7882 | -0.5000  | 1.0000  | 35.0000  | 1.0351 |
|    |   | 4.3074                                                     | -0.2315  | 14.3578 | 1.0000  | -0.0991  | 5.1373  | 1.0000   | 0.0000 |
| 2  | 5 | 154.6080                                                   | 0.0000   | 0.0000  | -0.1948 | -0.2000  | 0.0000  | 16.0000  | 0.1676 |
|    |   | 16.3699                                                    | -0.2000  | 15.0000 | 1.0000  | -0.2265  | 7.1308  | 0.0000   | 0.0000 |
| 3  | 5 | 0.0000                                                     | 0.0000   | 0.0000  | 0.5000  | -0.2000  | 0.0000  | 16.0000  | 0.5000 |
|    |   | 1.0001                                                     | -0.2000  | 15.0000 | 1.0000  | -0.1000  | 15.0000 | 0.0000   | 0.0000 |
| 5  | 5 | 0.7216                                                     | 0.0000   | 0.0000  | 0.2298  | -0.3500  | 1.0000  | 25.0000  | 0.8427 |
|    |   | 0.1167                                                     | -0.2500  | 15.0000 | 1.0000  | -0.1506  | 7.3516  | 1.0000   | 0.0000 |
| 4  | 5 | 41.1590                                                    | 0.0000   | 0.0000  | 0.6401  | -0.2000  | 0.0000  | 16.0000  | 0.4085 |
|    |   | 0.0992                                                     | -0.2000  | 15.0000 | 1.0000  | -0.0687  | 5.9021  | 0.0000   | 0.0000 |
| 10 |   | ! Nr of off-diagonal terms; Ediss;Ro;gamma;rsigma;rpi;rpi2 |          |         |         |          |         |          |        |
| 1  | 2 | 0.1239                                                     | 1.4004   | 9.8467  | 1.1210  | -1.0000  | -1.0000 |          |        |
| 1  | 3 | 0.0628                                                     | 1.9606   | 10.0282 | 1.3240  | 1.2084   | 1.0739  |          |        |
| 2  | 3 | 0.0283                                                     | 1.2885   | 10.9190 | 0.9215  | -1.0000  | -1.0000 |          |        |
| 3  | 4 | 0.3863                                                     | 1.6627   | 10.4263 | 1.8027  | 1.8954   | -1.0000 |          |        |
| 2  | 4 | 0.2410                                                     | 1.8010   | 9.0000  | 2.0472  | -1.0000  | -1.0000 |          |        |
| 1  | 5 | 0.1047                                                     | 1.6152   | 10.9681 | 1.3032  | -0.9400  | -1.0000 |          |        |
| 2  | 5 | 0.0431                                                     | 1.7204   | 10.3632 | 0.5386  | -1.0000  | -1.0000 |          |        |
| 3  | 5 | 0.1547                                                     | 2.1287   | 9.6188  | -1.0000 | -1.0000  | -1.0000 |          |        |
| 4  | 5 | 0.2002                                                     | 2.1104   | 11.4482 | 1.9513  | -1.0000  | -1.0000 |          |        |
| 5  | 5 | 0.1068                                                     | 2.1756   | 9.4701  | 1.8620  | -0.9330  | -1.0000 |          |        |
| 40 |   | ! Nr of angles;at1;at2;at3;Thetao,o;ka;kb;pv1;pv2          |          |         |         |          |         |          |        |
| 1  | 1 | 1                                                          | 74.9085  | 44.7514 | 0.9144  | 0.0000   | 0.0050  | 0.3556   | 2.5715 |
| 1  | 1 | 2                                                          | 65.7758  | 14.5234 | 6.2481  | 0.0000   | 0.5665  | 0.0000   | 1.6255 |
| 2  | 1 | 2                                                          | 70.2607  | 25.2202 | 3.7312  | 0.0000   | 0.0050  | 0.0000   | 2.7500 |
| 1  | 2 | 2                                                          | 0.0000   | 0.0000  | 6.0000  | 0.0000   | 0.0000  | 0.0000   | 1.0400 |
| 1  | 2 | 1                                                          | 0.0000   | 3.4110  | 7.7350  | 0.0000   | 0.0000  | 0.0000   | 1.0400 |
| 2  | 2 | 2                                                          | 0.0000   | 27.9213 | 5.8635  | 0.0000   | 0.0000  | 0.0000   | 1.0400 |
| 1  | 1 | 5                                                          | 65.7758  | 14.5234 | 6.2481  | 0.0000   | 0.5665  | 0.0000   | 1.6255 |
| 5  | 1 | 5                                                          | 70.2607  | 25.2202 | 3.7312  | 0.0000   | 0.0050  | 0.0000   | 2.7500 |
| 1  | 5 | 5                                                          | 0.0000   | 0.0000  | 6.0000  | 0.0000   | 0.0000  | 0.0000   | 1.0400 |
| 1  | 5 | 1                                                          | 0.0000   | 3.4110  | 7.7350  | 0.0000   | 0.0000  | 0.0000   | 1.0400 |
| 5  | 5 | 5                                                          | 0.0000   | 27.9213 | 5.8635  | 0.0000   | 0.0000  | 0.0000   | 1.0400 |
| 1  | 1 | 3                                                          | 49.6811  | 7.1713  | 4.3889  | 0.0000   | 0.7171  | 10.2661  | 1.0463 |
| 3  | 1 | 3                                                          | 77.7473  | 40.1718 | 2.9802  | -25.3063 | 1.6170  | -46.1315 | 2.2503 |
| 2  | 1 | 3                                                          | 65.0000  | 13.8815 | 5.0583  | 0.0000   | 0.4985  | 0.0000   | 1.4900 |
| 1  | 3 | 1                                                          | 73.5312  | 44.7275 | 0.7354  | 0.0000   | 3.0000  | 0.0000   | 1.0684 |
| 1  | 3 | 3                                                          | 79.4761  | 36.3701 | 1.8943  | 0.0000   | 0.7351  | 67.6777  | 3.0000 |
| 3  | 3 | 3                                                          | 80.7324  | 30.4554 | 0.9953  | 0.0000   | 1.6310  | 50.0000  | 1.0783 |
| 1  | 3 | 2                                                          | 70.1880  | 20.9562 | 0.3864  | 0.0000   | 0.0050  | 0.0000   | 1.6924 |
| 2  | 3 | 3                                                          | 75.6935  | 50.0000 | 2.0000  | 0.0000   | 1.0000  | 0.0000   | 1.1680 |
| 2  | 3 | 2                                                          | 85.8000  | 9.8453  | 2.2720  | 0.0000   | 2.8635  | 0.0000   | 1.5800 |
| 1  | 2 | 3                                                          | 0.0000   | 25.0000 | 3.0000  | 0.0000   | 1.0000  | 0.0000   | 1.0400 |
| 3  | 2 | 3                                                          | 0.0000   | 15.0000 | 2.8900  | 0.0000   | 0.0000  | 0.0000   | 2.8774 |
| 2  | 2 | 3                                                          | 0.0000   | 8.5744  | 3.0000  | 0.0000   | 0.0000  | 0.0000   | 1.0421 |
| 3  | 4 | 3                                                          | 76.2996  | 3.2695  | 3.5597  | 0.0000   | 1.0000  | 0.0000   | 1.4353 |
| 4  | 3 | 4                                                          | 82.2036  | 3.7033  | 7.0000  | 0.0000   | 1.0000  | 0.0000   | 1.0000 |
| 3  | 4 | 4                                                          | 56.2421  | 7.1704  | 2.7680  | 0.0000   | 1.0000  | 0.0000   | 3.9916 |
| 3  | 3 | 4                                                          | 53.6286  | 3.8270  | 2.2409  | 0.0000   | 1.0000  | 0.0000   | 1.2671 |
| 2  | 3 | 4                                                          | 90.0000  | 10.0000 | 3.0000  | 0.0000   | 1.0000  | 0.0000   | 3.1274 |
| 2  | 4 | 2                                                          | 86.0792  | 36.1486 | 2.4342  | 0.0000   | 1.0000  | 0.0000   | 3.1940 |

|    |                                                               |   |         |         |         |         |         |         |        |        |
|----|---------------------------------------------------------------|---|---------|---------|---------|---------|---------|---------|--------|--------|
| 2  | 4                                                             | 3 | 90.0000 | 39.9354 | 0.8289  | 0.0000  | 1.0000  | 0.0000  | 1.0265 |        |
| 2  | 2                                                             | 4 | 0.0000  | 2.5000  | 2.0000  | 0.0000  | 1.0000  | 0.0000  | 1.5000 |        |
| 3  | 2                                                             | 4 | 0.0000  | 5.0000  | 2.0000  | 0.0000  | 1.0000  | 0.0000  | 1.5000 |        |
| 2  | 4                                                             | 4 | 0.0000  | 2.5000  | 2.0000  | 0.0000  | 1.0000  | 0.0000  | 1.5000 |        |
| 4  | 2                                                             | 4 | 0.0000  | 7.5000  | 2.0000  | 0.0000  | 1.0000  | 0.0000  | 1.2500 |        |
| 3  | 2                                                             | 5 | 0.0000  | 8.5744  | 3.0000  | 0.0000  | 0.0000  | 0.0000  | 1.0421 |        |
| 2  | 5                                                             | 2 | 0.0000  | 27.9213 | 5.8635  | 0.0000  | 0.0000  | 0.0000  | 1.0400 |        |
| 4  | 5                                                             | 4 | 0.0000  | 2.0000  | 1.0000  | 0.0000  | 1.0000  | 0.0000  | 1.0000 |        |
| 5  | 4                                                             | 5 | 40.0000 | 1.0000  | 1.0000  | 0.0000  | 1.0000  | 0.0000  | 1.0000 |        |
| 4  | 5                                                             | 5 | 0.0000  | 10.0000 | 1.0000  | 0.0000  | 1.0000  | 0.0000  | 1.4000 |        |
| 4  | 4                                                             | 5 | 20.0000 | 0.0000  | 1.0000  | 0.0000  | 1.0000  | 0.0000  | 1.4000 |        |
| 33 | ! Nr of torsions;at1;at2;at3;at4;;V1;V2;V3;V2(BO);vconj;n.u;n |   |         |         |         |         |         |         |        |        |
| 1  | 1                                                             | 1 | 1       | 2.1207  | 26.8713 | 0.5160  | -9.0000 | -2.8394 | 0.0000 | 0.0000 |
| 1  | 1                                                             | 1 | 2       | -0.2500 | 29.2131 | 0.2945  | -4.9581 | -2.1802 | 0.0000 | 0.0000 |
| 2  | 1                                                             | 1 | 2       | -0.2500 | 31.2081 | 0.4539  | -4.8923 | -2.2677 | 0.0000 | 0.0000 |
| 1  | 1                                                             | 1 | 5       | -0.2500 | 29.2131 | 0.2945  | -4.9581 | -2.1802 | 0.0000 | 0.0000 |
| 2  | 1                                                             | 1 | 5       | -0.2500 | 31.2081 | 0.4539  | -4.8923 | -2.2677 | 0.0000 | 0.0000 |
| 5  | 1                                                             | 1 | 5       | -0.2500 | 31.2081 | 0.4539  | -4.8923 | -2.2677 | 0.0000 | 0.0000 |
| 1  | 5                                                             | 5 | 1       | -0.5529 | 9.9519  | 0.1490  | -6.0709 | 0.0000  | 0.0000 | 0.0000 |
| 1  | 1                                                             | 1 | 3       | -0.3495 | 22.2142 | -0.2959 | -2.5000 | -1.9066 | 0.0000 | 0.0000 |
| 2  | 1                                                             | 1 | 3       | 0.0646  | 24.3195 | 0.6259  | -3.9603 | -1.0000 | 0.0000 | 0.0000 |
| 5  | 1                                                             | 1 | 3       | 0.0646  | 24.3195 | 0.6259  | -3.9603 | -1.0000 | 0.0000 | 0.0000 |
| 3  | 1                                                             | 1 | 3       | -0.5456 | 5.5756  | 0.8433  | -5.1924 | -1.0180 | 0.0000 | 0.0000 |
| 1  | 1                                                             | 3 | 1       | 1.7555  | 27.9267 | 0.0072  | -2.6533 | -1.0000 | 0.0000 | 0.0000 |
| 1  | 1                                                             | 3 | 2       | -1.4358 | 36.7830 | -1.0000 | -8.1821 | -1.0000 | 0.0000 | 0.0000 |
| 2  | 1                                                             | 3 | 1       | -1.3959 | 34.5053 | 0.7200  | -2.5714 | -2.1641 | 0.0000 | 0.0000 |
| 5  | 1                                                             | 3 | 1       | -1.3959 | 34.5053 | 0.7200  | -2.5714 | -2.1641 | 0.0000 | 0.0000 |
| 2  | 1                                                             | 3 | 2       | -2.5000 | 70.0597 | 1.0000  | -3.5539 | -2.9929 | 0.0000 | 0.0000 |
| 5  | 1                                                             | 3 | 5       | -2.5000 | 70.0597 | 1.0000  | -3.5539 | -2.9929 | 0.0000 | 0.0000 |
| 1  | 1                                                             | 3 | 3       | 0.6852  | 11.2819 | -0.4784 | -2.5000 | -2.1085 | 0.0000 | 0.0000 |
| 5  | 1                                                             | 3 | 3       | 0.1933  | 80.0000 | 1.0000  | -4.0590 | -3.0000 | 0.0000 | 0.0000 |
| 2  | 1                                                             | 3 | 3       | 0.1933  | 80.0000 | 1.0000  | -4.0590 | -3.0000 | 0.0000 | 0.0000 |
| 3  | 1                                                             | 3 | 1       | -1.9889 | 76.4820 | -0.1796 | -3.8301 | -3.0000 | 0.0000 | 0.0000 |
| 3  | 1                                                             | 3 | 5       | 0.2160  | 72.7707 | -0.7087 | -4.2100 | -3.0000 | 0.0000 | 0.0000 |
| 3  | 1                                                             | 3 | 2       | 0.2160  | 72.7707 | -0.7087 | -4.2100 | -3.0000 | 0.0000 | 0.0000 |
| 3  | 1                                                             | 3 | 3       | -2.5000 | 71.0772 | 0.2542  | -3.1631 | -3.0000 | 0.0000 | 0.0000 |
| 1  | 3                                                             | 3 | 1       | 2.5000  | -0.6002 | 1.0000  | -3.4297 | -2.8858 | 0.0000 | 0.0000 |
| 1  | 3                                                             | 3 | 5       | -2.5000 | -3.3822 | 0.7004  | -5.4467 | -2.9586 | 0.0000 | 0.0000 |
| 1  | 3                                                             | 3 | 2       | -2.5000 | -3.3822 | 0.7004  | -5.4467 | -2.9586 | 0.0000 | 0.0000 |
| 5  | 3                                                             | 3 | 5       | 2.5000  | -4.0000 | 0.9000  | -2.5000 | -1.0000 | 0.0000 | 0.0000 |
| 2  | 3                                                             | 3 | 2       | 2.5000  | -4.0000 | 0.9000  | -2.5000 | -1.0000 | 0.0000 | 0.0000 |
| 1  | 3                                                             | 3 | 3       | 1.2329  | -4.0000 | 1.0000  | -2.5000 | -1.7479 | 0.0000 | 0.0000 |
| 5  | 3                                                             | 3 | 3       | 0.8302  | -4.0000 | -0.7763 | -2.5000 | -1.0000 | 0.0000 | 0.0000 |
| 2  | 3                                                             | 3 | 3       | 0.8302  | -4.0000 | -0.7763 | -2.5000 | -1.0000 | 0.0000 | 0.0000 |
| 3  | 3                                                             | 3 | 3       | -2.5000 | -4.0000 | 1.0000  | -2.5000 | -1.0000 | 0.0000 | 0.0000 |
| 1  | ! Nr of hydrogen bonds;at1;at2;at3;Rhb;Dehb;vhb1              |   |         |         |         |         |         |         |        |        |
| 3  | 2                                                             | 3 | 2.1200  | -3.5800 | 1.4500  | 19.5000 |         |         |        |        |



Refinement of a few bond distances and the C-F-F-C dihedral angle

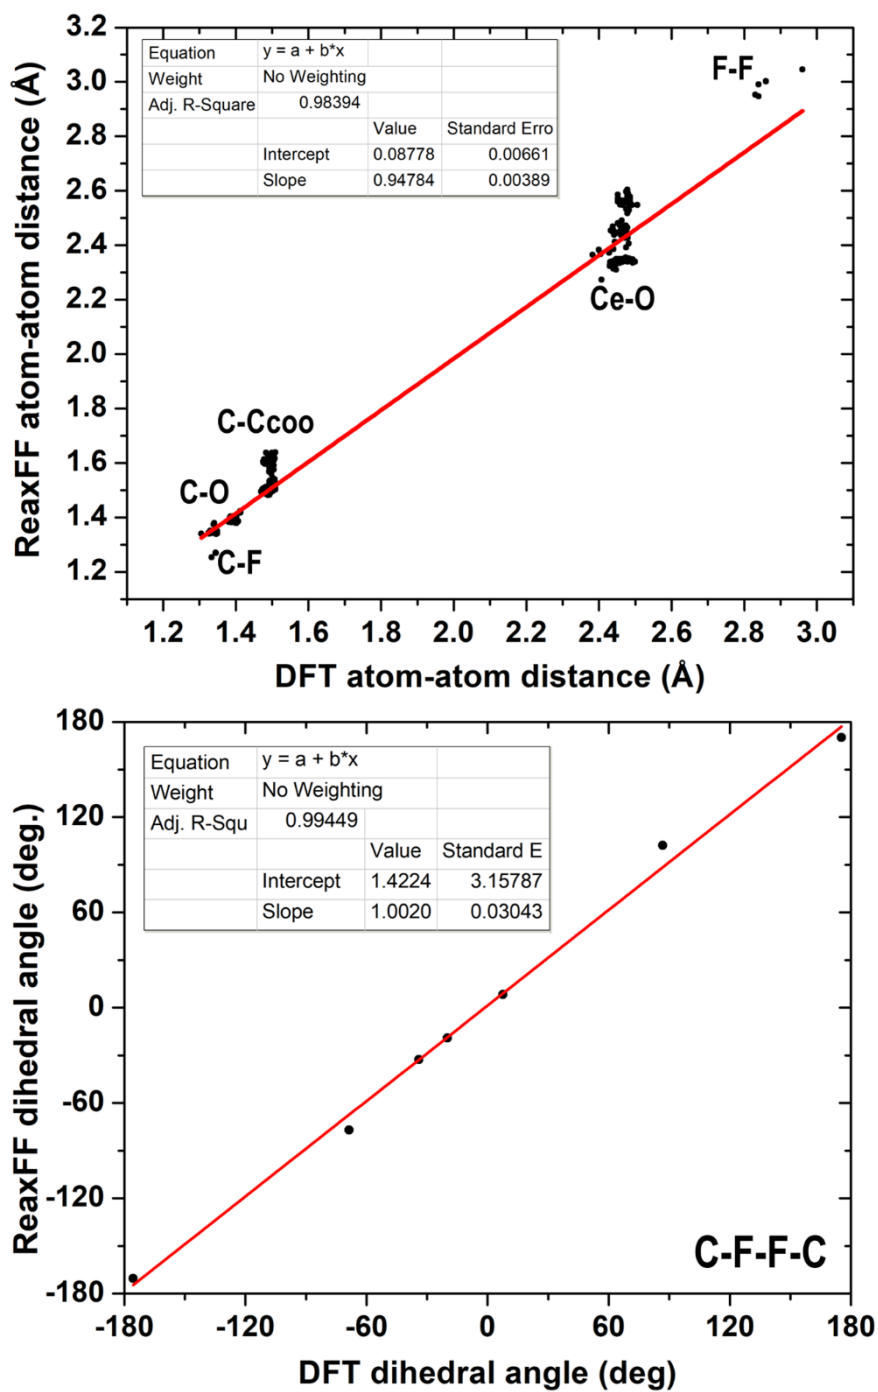

Comparison of the positions of the ligand oxygens sampled through quantum and classical MD simulations at ambient temperature. In both simulations, we sampled 12000 configurations.

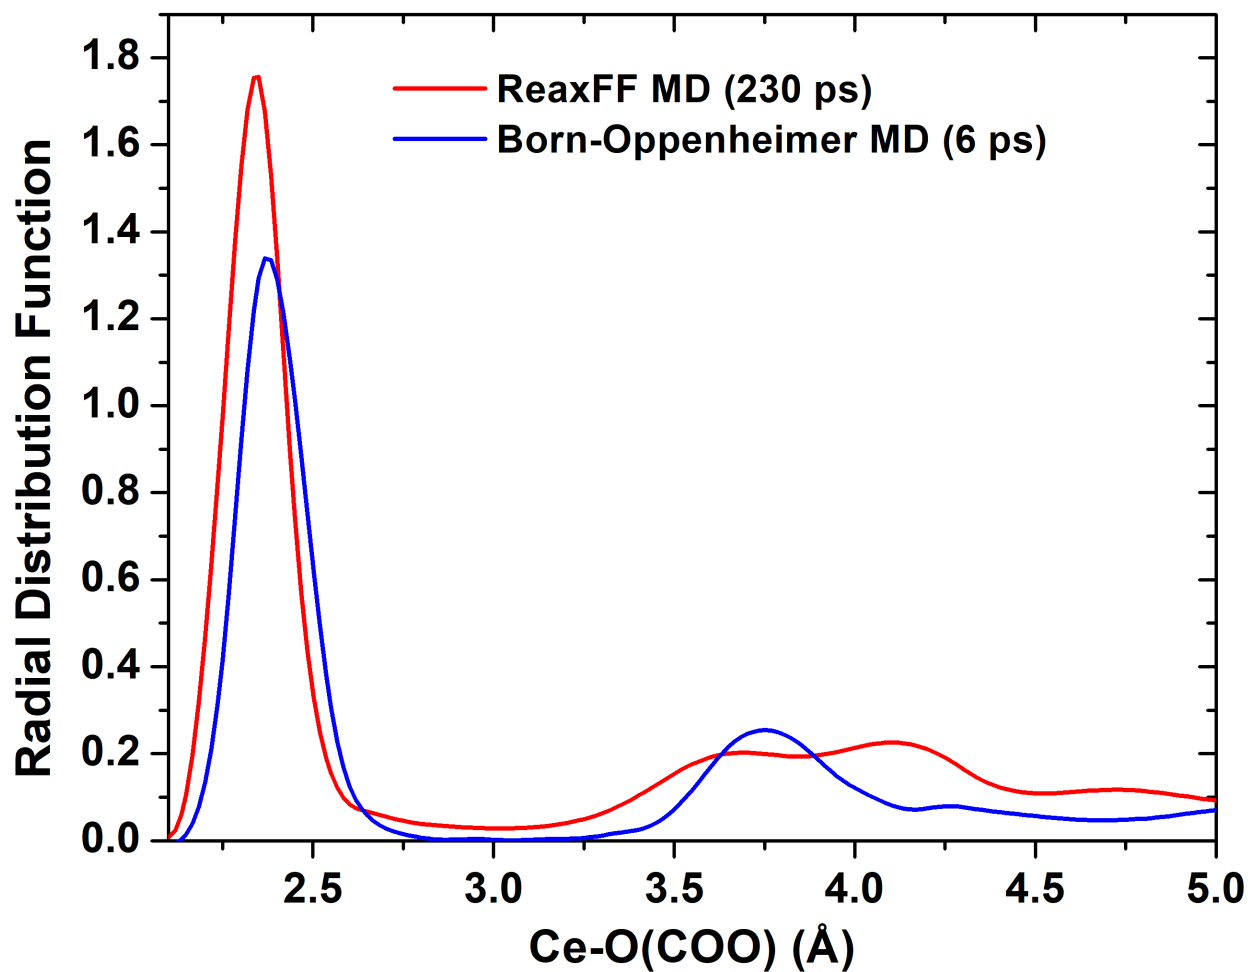

Supplement: d3nr02760k2.pdf [file d3nr02760k2.pdf]
